# Supplementary material
Source: PubMed Central journal article supplement (PMC9258774)
Supplement: NEJMc2206725_appendix.pdf [file NEJMc2206725_appendix.pdf]

## Supplementary Appendix

Supplement to: Qu P, Faraone J, Evans JP, et al. Neutralization of the SARS-CoV-2 omicron BA.4/5 and BA.2.12.1 subvariants. *N Engl J Med*. DOI: 10.1056/NEJMc2206725

This appendix has been provided by the authors to give readers additional information about the work.

## Supplementary Appendix

### CONTENTS

|                                                                                                                                                                           |    |
|---------------------------------------------------------------------------------------------------------------------------------------------------------------------------|----|
| Supplementary Methods .....                                                                                                                                               | 3  |
| Acknowledgements .....                                                                                                                                                    | 7  |
| Author Contributions .....                                                                                                                                                | 7  |
| Table S1. ....                                                                                                                                                            | 8  |
| Figure S1: BA.4/5 and BA.2.12.1 subvariants are more highly infectious in 293T-ACE2 cells but comparably low infectivity in CaLu-3 cells relative to BA.1 and BA.2.. .... | 9  |
| Figure S2: Heterogeneity of neutralization resistance by two-dose and 3-dose HCWs based on individual immunity and vaccine type.. ....                                    | 11 |
| Figure S3: Vaccinated Delta-wave sera more strongly neutralizes BA.4/5 and BA.2.12.1 compared to BA.1 and BA.2.. ....                                                     | 13 |
| Supplementary References .....                                                                                                                                            | 15 |

## Neutralization of SARS-CoV-2 Omicron BA.4/5 and BA.2.12.1 Subvariants

Panke Qu, M.S.<sup>1,#</sup>, Julia N. Faraone, B.S.<sup>1,#</sup>, John P. Evans, M.S.<sup>1,#</sup>, Xue Zou, Ph.D.<sup>1</sup>, Yi-Min Zheng, M.D.<sup>1</sup>, Claire Carlin<sup>1</sup>, Joseph S. Bednash, M.D.<sup>1</sup>, Gerard Lozanski, M.D.<sup>1</sup>, Rama K. Mallampalli, M.D.<sup>1</sup>, Linda J. Saif, Ph.D.<sup>1</sup>, Eugene M. Oltz, Ph.D.<sup>1</sup>, Peter J. Mohler, Ph.D.<sup>1</sup>, Richard J. Gumina, M.D., Ph.D.<sup>1</sup>, and Shan-Lu Liu, M.D., Ph.D.<sup>1\*</sup>.

<sup>1</sup>The Ohio State University, Columbus, OH, USA

\*Corresponding author: Shan-Lu Liu, M.D., Ph.D., Center for Retroviral Research, Department of Veterinary Biosciences, Department of Microbial Infection and Immunity, and Infectious Diseases Institutes, The Ohio State University

<sup>#</sup>Authors contributed equally to this work

1900 Coffey Road, Columbus, OH 43210; Telephone: (614) 292-8690;

Fax: (614) 292-6473; Email: [liu.6244@osu.edu](mailto:liu.6244@osu.edu)

## Supplementary Methods

### *Vaccinated and hospitalized/ICU patient cohorts*

Two-dose vaccinated health care worker (HCW) samples were collected under approved IRB protocols (2020H0228 and 2020H0527). Demographic information was self-reported, and all subjects provided informed consent. Sera were collected 3-4 weeks post-second vaccine dose for 15 HCWs (7 female and 8 male; median age 37; age range 31-56), which included 4 Moderna mRNA-1273 and 11 Pfizer/BioNTech BNT162b2 vaccinated HCWs.

Boosted HCW samples were additionally collected under the same IRB protocols. Demographic information was self-reported, and all subjects provided informed consent. Sera were collected 1-11 weeks post-homologous booster vaccine dose for 15 HCWs (7 female and 8 male; median age 37; age range 22-48), which included 4 Moderna mRNA-1273 and 11 Pfizer/BioNTech BNT162b2 vaccinated HCWs. Note that 12 HCWs had both post-second dose samples and post-booster dose samples analyzed.

Delta-wave ICU patient samples were collected under an approved IRB protocol (2020H0175). Demographic information was self-reported, and all subjects provided informed consent. Plasma samples were collected 3 days after ICU admission for 18 Delta-wave patients (6 female and 12 male; median age 60; age range 22-87; 4 African American/Black non-Hispanic or Latino, 1 White Hispanic or Latino, and 13 White non-Hispanic or Latino). Where detectable, the variant of SARS-CoV-2 infecting the ICU patients was confirmed by viral RNA extraction on nasal swabs with QIAamp MinElute Virus Spin kit followed by RT-PCR (CDC N1 F: 5'-GACCCCAAATCAGCGAAAT-3'; CDC N1 R: 5'-TCTGGTACTGCCAGTTGAATCTG-3'; CDC N2 F: 5'-TTACAAACATTGGCCGCAAA-3'; CDC N2 R: 5'-

GCGCGACATTCCGAAGAA-3') and Sanger sequencing to identify the variant. In total, 5/18 patients were confirmed to have been infected with Delta. Additionally, these Delta-wave patients included 1 patient vaccinated with 1 dose of the Johnson & Johnson vaccine, 4 patients vaccinated with 2 doses of the Pfizer/BioNTech BNT162b2 vaccine, and 1 patient vaccinated with 3 doses of the Moderna mRNA-1273 vaccine.

Omicron-wave hospitalized patient samples were collected under an approved IRB (2020H0527). Demographic information was self-reported, and all subjects provided informed consent. Sera were collected 1-8 days after hospitalization for 30 COVID-19 patients (11 female and 19 male; median age 62; age range 28-78) admitted in late January and February of 2022. These included 15 unvaccinated patients. Additionally, 8 patients were vaccinated with two doses of the Pfizer/BioNTech BNT16b2 vaccine (n = 4) or Moderna mRNA-1273 vaccine (n = 4), and sample collection occurred 5-11 months (median 9 months) after 2nd vaccine dose. Finally, 7 patients were vaccinated with three doses of the Pfizer/BioNTech BNT162b2 vaccine and sample collection occurred 2-6 months (median 5 months) after booster vaccine administration.

#### *Cell lines and maintenance*

All cell lines were maintained in 5% CO<sub>2</sub> and at 37°C. HEK293T (ATCC CRL-11268, RRID: CVCL\_1926) and HEK293T-ACE2 (BEI NR-52511, RRID: CVCL\_A7UK) cells were maintained in DMEM (Gibco, 11965-092) supplemented with 10% FBS (Sigma, F1051) and 1% penicillin-streptomycin (HyClone, SV30010). CaLu-3 cells (RRID: CVCL\_0609) were maintained in EMEM (ATCC 30-2003) supplemented with 10% FBS and 1% penicillin-streptomycin.

### *Plasmids*

Pseudotyped virus was produced using a pNL4-3-inGluc lentivirus vector which contains a  $\Delta$ ENV HIV-1 backbone bearing a *Gaussia* luciferase reporter gene<sup>1,2</sup>. GenScript Biotech (Piscataway, NJ) produced and cloned SARS-CoV-2 spike constructs with N- and C-terminal flag tags using KpnI and BamHI restriction enzyme cloning into a pcDNA3.1 vector.

### *Pseudotyped lentivirus production and infectivity*

Lentiviral pseudotypes were produced as previously described<sup>3</sup>. pNL4-3-inGluc and spike constructs were transfected into HEK-293T cells in a 2:1 ratio using polyethylenimine transfection. Pseudotyped virus was harvested 48 and 72 hrs after transfection. Pseudotyped virus for each SARS-CoV-2 spike, produced in parallel, were used to infect target HEK293T-ACE2 or CaLu-3 cells. *Gaussia* luciferase activity was assessed 48 hrs after infection by combining *Gaussia* luciferase substrate (0.1M Tris pH 7.4, 0.3M sodium ascorbate, 10  $\mu$ M coelenterazine) with cell culture media. Luminescence was immediately measured by a BioTek Cytation5 plate reader.

### *Virus neutralization assay*

Pseudotyped lentivirus neutralization assays were performed as previously described<sup>2-5</sup>. HCW serum or hospitalized/ICU patient plasma was serially diluted. Equal amounts of infectious pseudotyped lentivirus bearing SARS-CoV-2 S protein were added to the diluted serum, resulting in final dilutions of 1:80, 1:320, 1:1280, 1:5120, 1:20480, and no serum control for HCW and

BA.1-wave samples. Delta-wave samples were treated with Triton X-100 to inactivate virus. To prevent Triton X-100 toxicity from impacting the assay, final dilutions for Delta-wave serum were 1:1280, 1:2560, 1:5120, 1:10240, and 1:20480. Virus and serum were incubated for 1 hr at 37°C and then added to HEK293T-ACE2 cells for infection by neutralized virus. Gaussia luciferase output by infected cells was measured 48 and 72 hrs after infection by taking 20  $\mu$ L of infected cell culture media and adding 20  $\mu$ L of Gaussia luciferase substrate. Luminescence was measured immediately using a BioTek Cytation5 plate reader. NT<sub>50</sub> values were determined by least-squares-fit, non-linear regression in GraphPad Prism 9 (San Diego, CA). Heat maps with NT<sub>50</sub> generated by GraphPad Prism 9.

### **Quantification and Statistical Analysis**

All statistical analysis was performed using GraphPad Prism 9 and are described in the figure legends. NT<sub>50</sub> values were determined by least-squares fit non-linear regression in GraphPad Prism 9. Throughout, n refers to subject number and bars represent either  $\pm$  standard deviation (**Fig S1 B and C**) or geometric means  $\pm$  95% confidence intervals (**Fig 1A-D, S2B and D, S3B and D**). Generally, comparisons between multiple groups were made using a one-way repeated measures ANOVA with Bonferroni post-test (**Fig 1A-D, Fig S1B-C**) or two-way repeated measures ANOVA with Bonferroni post-test (**Fig S2B and D, Fig S3B and D**). Analysis of the influence of sex on neutralization capacity could not be performed due to small sample size—confounding variables including vaccination status, vaccine type, and time since vaccination would skew such an analysis. Infectivity was quantified using luminescence readings measured by a BioTek Cytation5 plate reader. Three readings were taken and averaged for each of the three replicates.

## **Acknowledgements**

We thank the NIH AIDS Reagent Program and BEI Resources for providing important reagents for this work. We also thank the Clinical Research Center/Center for Clinical Research Management of The Ohio State University Wexner Medical Center and The Ohio State University College of Medicine in Columbus, Ohio, specifically Francesca Madaia, Dina McGowan, Breona Edwards, Evan Long, and Trina Wemlinger, for logistics, collection and processing of samples. In addition, we thank Sarah Karow, Madison So, Preston So, Daniela Farkas, and Finny Johns in the clinical trials team of The Ohio State University for sample collection and other supports.

## **Author Contributions**

S.-L.L. conceived and directed the project. P.Q. performed most of the experiments. J.N.F, X.Z., J.P.E. assisted in experiments and contributed data processing and analyses. C.C., J.S.B., G.L., R.K.M., R.J.G. provided clinical samples. P.Q., J.N.F., J.P.E., and S.-L.L. wrote the paper. P.J.M. facilitated shipping of the original Omicron construct. Y.-M.Z, L.J.S., E.M.O., P.J.M., and R.J.G. provided insightful discussion and revision of the manuscript.



|                                                                         | 2-dose HCWs<br>(n=15)   | 3-dose HCWs<br>(n=15)  | Delta-Wave ICU<br>Patients (n=18) | Omicron-Wave<br>Non-ICU Patients (n=30) |
|-------------------------------------------------------------------------|-------------------------|------------------------|-----------------------------------|-----------------------------------------|
| <b>Age in Years at Sample Collection</b><br>[Median (Range)]            | 37 (31-56)              | 37 (22-48)             | 60 (22-87)                        | 62 (28-78)                              |
| <b>Gender</b> [n (% of Total)]                                          |                         |                        |                                   |                                         |
| Male                                                                    | 8 (53.3%)               | 8 (53.3%)              | 12 (66.7%)                        | 19 (63.3%)                              |
| Female                                                                  | 7 (46.7%)               | 7 (46.7%)              | 6 (33.3%)                         | 11 (36.7%)                              |
| <b>Sample Collection Window</b>                                         | Jan.2021-<br>Mar. 2021, | Oct. 2021-<br>Nov.2021 | Aug. 2021-<br>Dec. 2021           | Feb. 2022-<br>Mar. 2022                 |
| <b>Type of Vaccine</b> [n (% of Total)]                                 |                         |                        |                                   |                                         |
| 2-dose Moderna                                                          | 4 (36.4%)               | na                     | na                                | 4 (13.3%)                               |
| 2-dose Pfizer                                                           | 11 (63.6%)              | na                     | 4 (22.2%)                         | 4 (13.3%)                               |
| 3-dose Moderna                                                          | na                      | 4 (36.4%)              | 1 (5.6%)                          | na                                      |
| 3-dose Pfizer                                                           | na                      | 11(63.6%)              | na                                | 7 (23.3%)                               |
| 1-dose J&J                                                              | na                      | na                     | 1 (5.6%)                          | na                                      |
| <b>Sample Collection Timing</b> [Median<br>(Range)]                     |                         |                        |                                   |                                         |
| Days post 1 <sup>st</sup> dose for Recipients of one<br>dose            | na                      | na                     | 141                               | na                                      |
| Days post 2 <sup>nd</sup> dose for Recipients of two<br>doses           | 27<br>(22-31)           | na                     | 255<br>(204-254)                  | 313<br>(149-367)                        |
| Days post 3 <sup>rd</sup> dose for Recipients of three<br>doses         | na                      | 18 (5-80)              | 12                                | 158 (64-183)                            |
| <b>Prior SARS-CoV-2 Infection Confirmed<br/>by PCR</b> [n (% of Total)] | 1 (6.7%)                | 2 (13.3%)              | dnc                               | dnc                                     |

**Table S1: Demographic and sample collection information of HCWs and Delta- or Omicron-wave patients.** Summary information for the HCW sera samples collected post 2-dose and 3-dose of mRNA is shown. In addition, summary information of the Delta-wave ICU and Omicron-wave

non-ICU COVID-19 patients is also provided. na means “not applicable”, and dnc indicates “data not collected”.

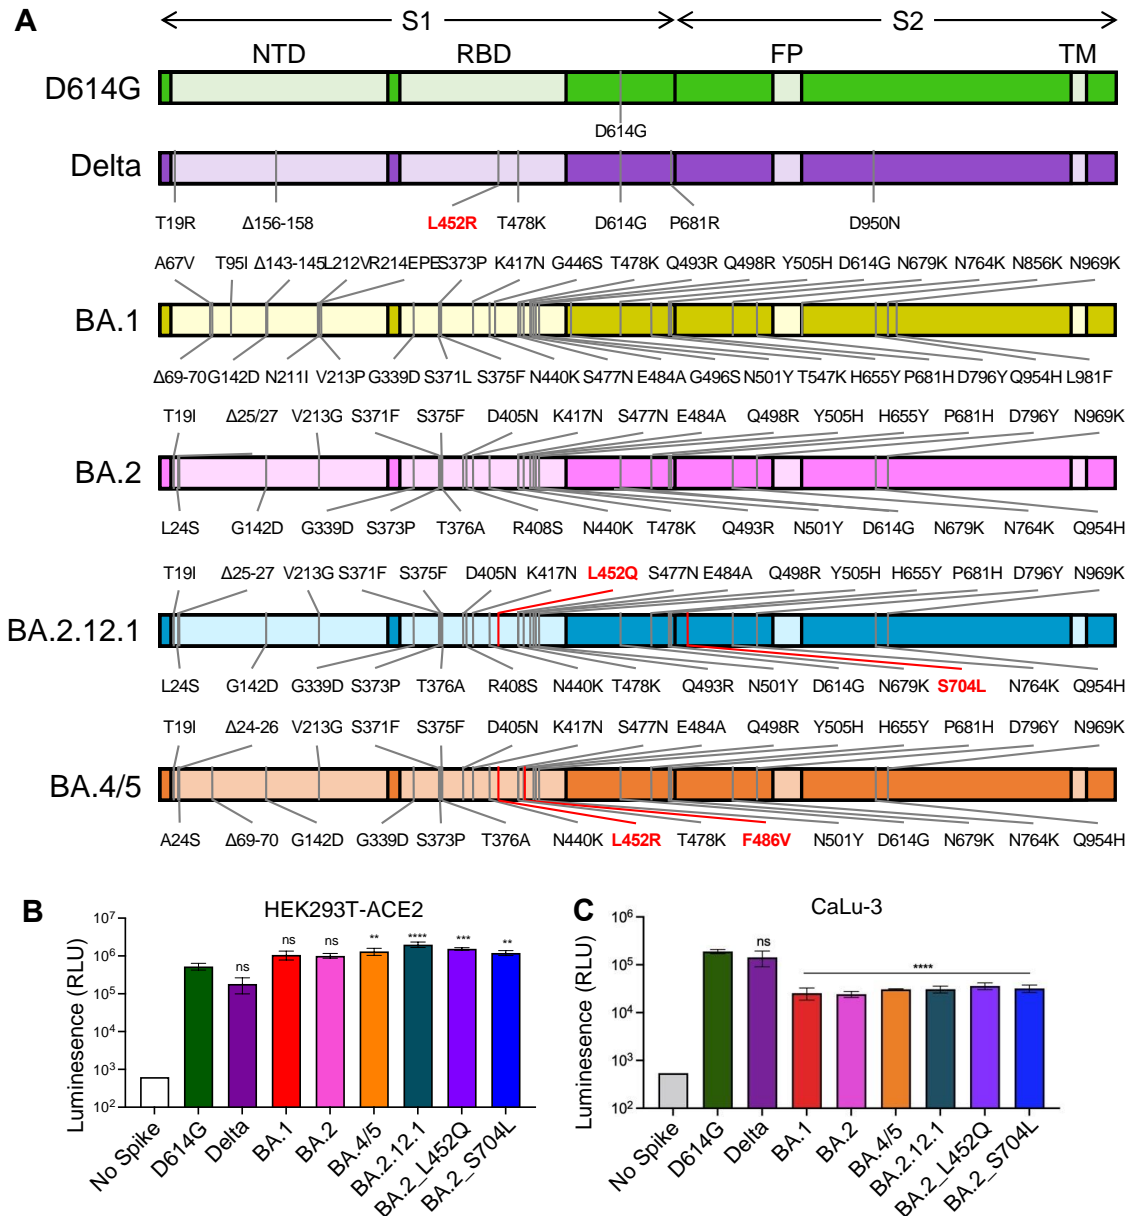

**Figure S1. BA.4/5 and BA.2.12.1 subvariants are more infectious in HEK293T-ACE2 cells but exhibit comparably low infectivity in CaLu-3 cells relative to BA.1 and BA.2. (A)**

Schematic of SARS-CoV-2 variant spike proteins used for pseudotyping HIV-1 lentiviral vector

and neutralization assays. **(B)** Infectivity of pseudotyped viruses in HEK293T cells stably expressing ACE2 (HEK293T-ACE2). **(C)** Infectivity of pseudotyped lentivirus in human lung epithelia-derived CaLu-3 cells. Bars in **(B)** and **(C)** represent means  $\pm$  standard deviation, and significance is determined by one-way repeated measures ANOVA with Bonferroni's multiple testing correction. Results of at least 3 independent experiments are averaged and shown. P-values are represented as \*\*p < 0.01, \*\*\*p < 0.001, \*\*\*\*p < 0.0001, ns, not significant.

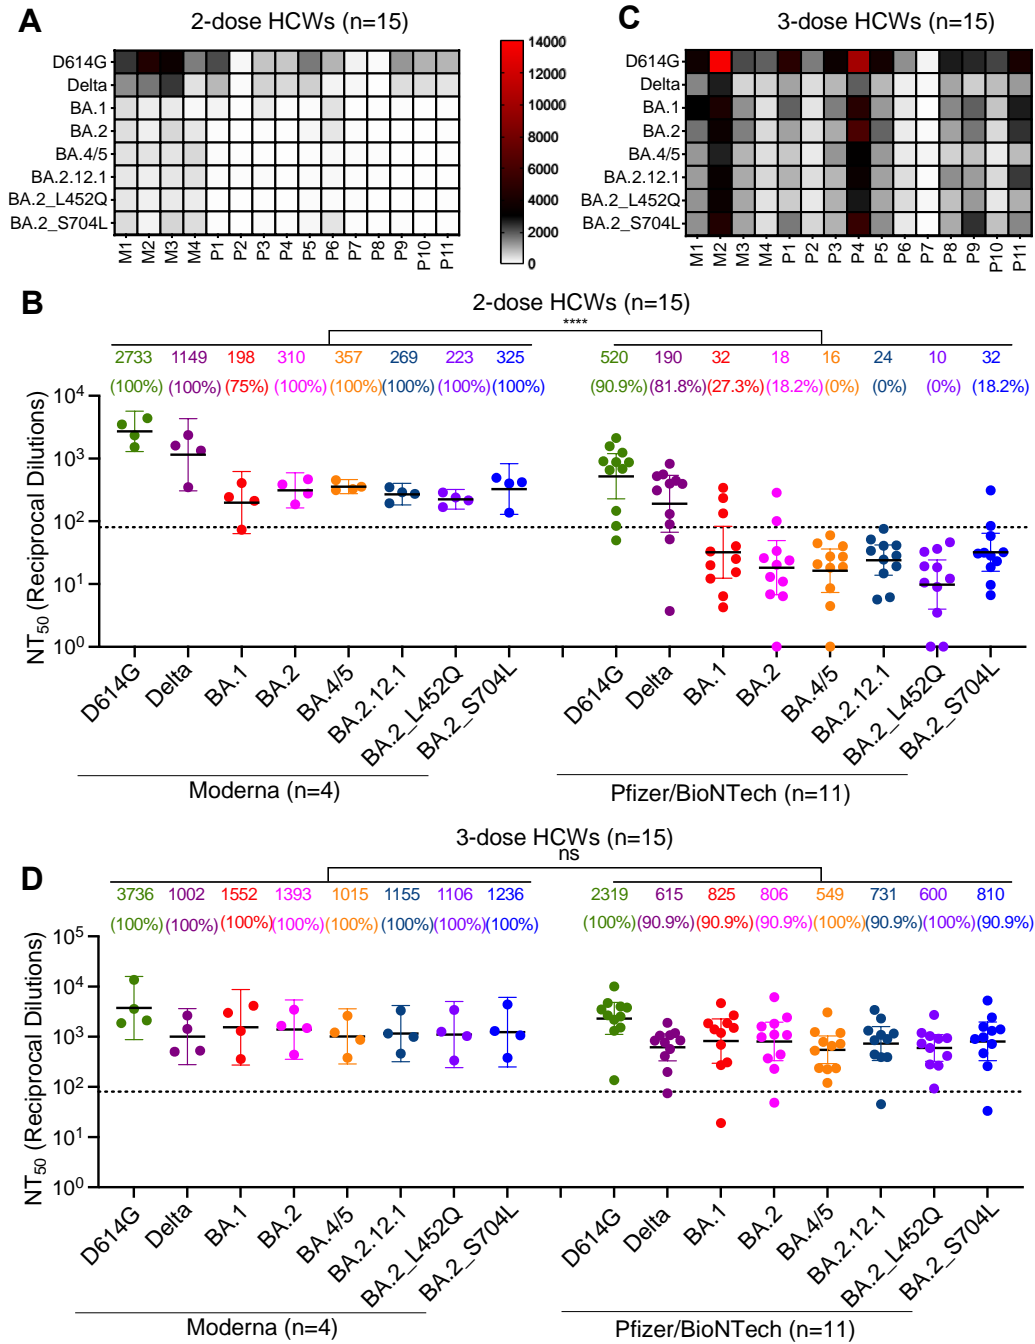

**Figure S2. Heterogeneity of neutralization resistance by two-dose and 3-dose HCWs based on individual immunity and vaccine type.** (A) Heatmap depicting NT<sub>50</sub> values of HCWs that received 2-doses of either Moderna mRNA-1273 (“M”) or Pfizer/BioNTech BNT162b2 (“P”) vaccines; corresponding to data in Fig. 1B. (B) NT<sub>50</sub> values for HCWs who received either two

doses of Moderna mRNA-1273 (n=4) or Pfizer/BioNTech BNT162b2 (n=11) plotted by vaccine type. **(C)** Heatmap depicting NT<sub>50</sub> values of HCWs that received 3-doses of either Moderna or Pfizer mRNA vaccines; corresponding to data in Fig. 1C. **(D)** NT<sub>50</sub> values for HCWs who received a homologous booster of Moderna (n=4) or Pfizer (n=11) vaccines plotted by vaccine type. Geometric mean NT<sub>50</sub> values are depicted at the top of graphs **(B and D)** along with the percentage of subjects with NT<sub>50</sub> values above the limit of detection (NT<sub>50</sub> = 80, dotted line) . Bars represent geometric mean ± 95% confidence interval and significance was determined by two-way repeated measures ANOVA with Bonferroni's multiple testing correction. P values are represented as \*\*\*\*p < 0.0001, ns, not significant.

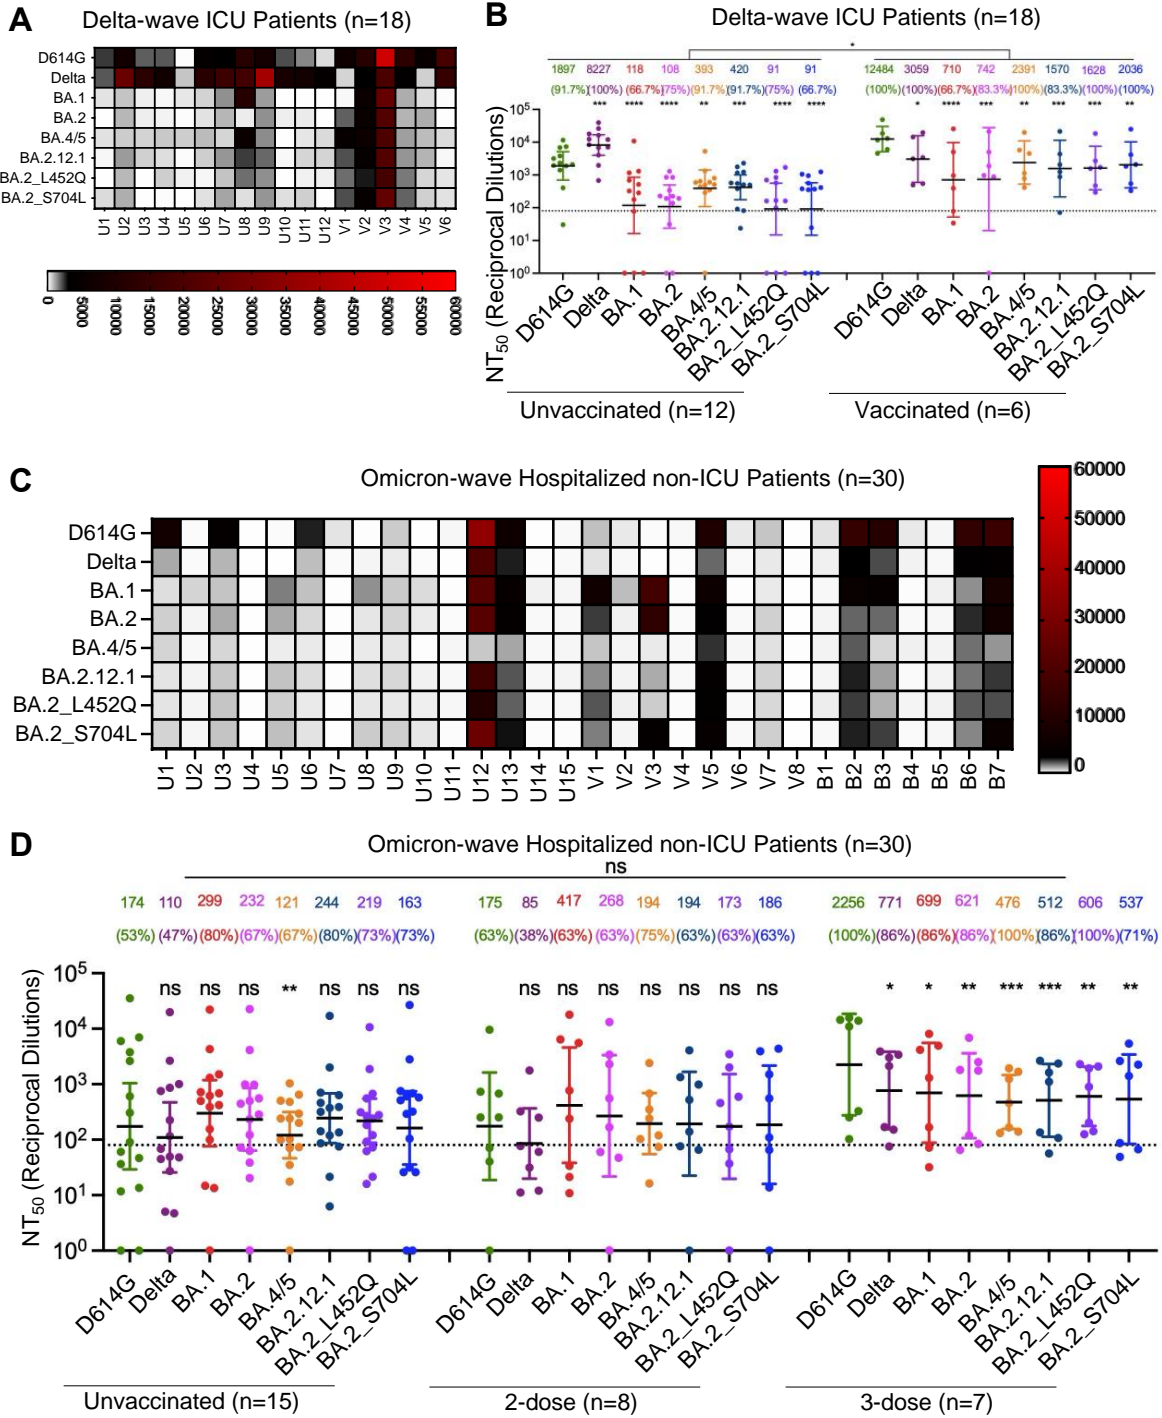

**Figure S3. Vaccinated Delta-wave sera more strongly neutralizes BA.4/5 and BA.2.12.1 compared to BA.1 and BA.2.** (A) A heatmap depicting individual patient NT<sub>50</sub> values from Delta

wave patients. Patients are identified by “U” for unvaccinated and “V” for vaccinated; corresponding to data in Fig. 1D. **(B)** NT<sub>50</sub> data from **Fig. 1C** is plotted by vaccination status with unvaccinated (n=12) and vaccinated (n=6) individuals. **(C)** A heatmap showing patient NT<sub>50</sub> values against each variant for BA.1-wave patients. Patients are identified by “U” and “V” as described for **(A)** and “B” for 3-dose boosted samples; corresponding to data in Fig. 1E. **(D)** NT<sub>50</sub> data from **Fig 1D** is plotted by vaccination status with unvaccinated (n=15), 2-dose (n=8), and 3-dose (n=7) individuals depicted. Geometric mean NT<sub>50</sub> values are displayed at the top of plots **(B and D)** along with the percentage of patients with NT<sub>50</sub> values above the limit of detection (NT<sub>50</sub> = 80, dotted line); bars represent geometric mean ± 95% confidence interval and significance was determined by two-way repeated measures ANOVA with Bonferroni’s multiple testing correction. p-values are represented as \*p<0.05, \*\*p < 0.01, \*\*\*p < 0.001, \*\*\*\*p < 0.0001, ns, not significant.

## Supplementary References

1. Goerke, A. R., Loening, A. M., Gambhir, S. S. & Swartz, J. R. Cell-free metabolic engineering promotes high-level production of bioactive *Gaussia princeps* luciferase. *Metabolic Engineering* **10**, 187–200 (2008).
2. Zeng, C. *et al.* Neutralizing antibody against SARS-CoV-2 spike in COVID-19 patients, health care workers, and convalescent plasma donors. *JCI Insight* **5**, (2020).
3. Evans, J. P. *et al.* Loss of Neutralizing Antibody Response to mRNA Vaccination against SARS-CoV-2 2 Variants: Differing Kinetics and Strong Boosting by Breakthrough Infection 3 4 5. *bioRxiv* (2021) doi:10.1101/2021.12.06.471455.
4. Zeng, C. *et al.* Impaired neutralizing antibody response to COVID-19 mRNA vaccines in cancer patients. *Cell and Bioscience* vol. 11 (2021).
5. Zeng, C. *et al.* Neutralization of SARS-CoV-2 Variants of Concern Harboring Q677H. *mBio* **12**, (2021).
